# Supplementary material for: Diffusion Dialysis for Separation of Hydrochloric Acid, Iron and Zinc Ions from Highly Concentrated Pickling Solutions
Source: MDPI journal article supplement (doi:10.3390/membranes10060129), 2020-06-24
Supplement: s1 [file s1]

# Supplementary Materials: Diffusion Dialysis for Separation of Hydrochloric Acid, Iron and Zinc Ions from Highly Concentrated Pickling Solutions

Rosa Gueccia <sup>1</sup>, Alba Ruiz Aguirre <sup>1,2</sup>, Serena Randazzo <sup>1</sup>, Andrea Cipollina <sup>1,\*</sup>, Giorgio Micale <sup>1</sup>

<sup>1</sup> Department of Engineering, University of Palermo, viale delle Scienze Ed.6, 90128 Palermo, Italy; rosa.gueccia@unipa.it (R.G.); alba.ruizaguirre@unipa.it (A.R.A.); serena.randazzo@unipa.it (S.R.); giorgiod.maria.micale@unipa.it (G.M.)

<sup>2</sup> CIEMAT PSA, Ctra. De Senés, 04200 Tabernas, Spain

\* Correspondence: andrea.cipollina@unipa.it

## 1 Membrane Properties

The properties of the Fumasep membranes (type FAD-PET-75, by Fumatech GmbH, <https://www.fumatech.com/EN/Onlineshop/Products%2bof%2bHydrocarbon%2bpolymer/index.html>) are presented in Table S1.

**Table S1.** Properties of Fumasep FAD type anion exchange membrane.

| Item                                                 | Unit                     | Specifications |
|------------------------------------------------------|--------------------------|----------------|
| thickness (dry)                                      | μm                       | 70-80          |
| electric resistance <sup>a)</sup>                    | Ω cm <sup>2</sup>        | <1             |
| selectivity <sup>b)</sup>                            | %                        | >90            |
| stability                                            | pH                       | <9             |
| ion exchange capacity                                | meq/g                    | >1.5           |
| specific conductance <sup>c)</sup>                   | mS/cm                    | > 13           |
| weight per unit area                                 | mg/cm <sup>2</sup>       | 9-12           |
| proton (H <sup>+</sup> ) transfer rate <sup>d)</sup> | mmol/min/cm <sup>2</sup> | >1500          |
| Young's modulus <sup>e)</sup>                        | MPa                      | >1000          |
| tensile strength <sup>e)</sup>                       | MPa                      | >40            |
| elongation at break <sup>e)</sup>                    | %                        | >15            |
| bubble point test in water at T = 25 °C              | bar                      | >3             |

<sup>a)</sup> in Cl<sup>-</sup> form in 0.5 M NaCl at T = 25°C, measured in standard measuring cell (through-plane)

<sup>b)</sup> determined from membrane potential measurement in a concentration cell 0.1/0.5 M KCl at T = 25°C

<sup>c)</sup> determined in Cl<sup>-</sup> form in 0.5 NaCl at T = 30°C

<sup>d)</sup> determined from pH potential measurement in a concentration cell 0.5 M HCl/0.5 M KCl at T = 25°C

<sup>e)</sup> determined by stress-strain measurement at T = 25°C and 50 % r.h., according to DIN EN 527-1

## 2. Equilibrium Species Dissociation

Dissociation reactions equilibria for the HCl+ ZnCl<sub>2</sub> and HCl+ FeCl<sub>2</sub> systems are reported in Table S2 where also the equilibrium dissociation constants are shown (source: PHREEQC software, <https://www.usgs.gov/software/phreeqc-version-3>).

**Table S2.** Dissociation reactions for the HCl+ ZnCl<sub>2</sub> and HCl+ FeCl<sub>2</sub> systems and relative equilibrium constants (source: PHREEQC software).

| Dissociation reaction                         | $-\log K_{eq}$ | Equilibrium Constant $K_{eq}$ |
|-----------------------------------------------|----------------|-------------------------------|
| $ZnCl^+ \leftrightarrow Zn^{2+} + Cl^-$       | 0.43           | $k_1 = 0.37$                  |
| $ZnCl_2 \leftrightarrow Zn^{2+} + 2Cl^-$      | 0.45           | $k_2 = 0.35$                  |
| $ZnCl_3^- \leftrightarrow Zn^{2+} + 3Cl^-$    | 0.5            | $k_3 = 0.32$                  |
| $ZnCl_4^{2-} \leftrightarrow Zn^{2+} + 4Cl^-$ | 0.2            | $k_4 = 0.63$                  |
| $FeCl^+ \leftrightarrow Fe^{2+} + Cl^-$       | 0.43           | $k_1 = 0.37$                  |

Different species concentration for the HCl+ ZnCl<sub>2</sub> system were assessed from Equations (S1) to (S7):

$$[ZnCl^+] = \frac{[Zn^{2+}][Cl^-] Y_{Zn^{2+}} Y_{Cl^-}}{k_1 Y_{ZnCl^+}} \quad (S1)$$

$$[ZnCl_2] = \frac{[Zn^{2+}][Cl^-]^2 Y_{Zn^{2+}} Y_{Cl^-}^2}{k_2 Y_{ZnCl_2}} \quad (S2)$$

$$[ZnCl_3^-] = \frac{[Zn^{2+}][Cl^-]^3 Y_{Zn^{2+}} Y_{Cl^-}^3}{k_3 Y_{ZnCl_3^-}} \quad (S3)$$

$$[ZnCl_4^{2-}] = \frac{[Zn^{2+}][Cl^-]^4 Y_{Zn^{2+}} Y_{Cl^-}^4}{k_4 Y_{ZnCl_4^{2-}}} \quad (S4)$$

$$[Zn]_{TOT} = [ZnCl^+] + [ZnCl_2] + [ZnCl_3^-] + [ZnCl_4^{2-}] + [Zn^{2+}] \quad (S5)$$

$$[Zn^{2+}] = \frac{[Zn]_{TOT}}{1 + [Cl^-] Y_{Zn^{2+}} Y_{Cl^-} \left( \frac{1}{k_1 Y_{ZnCl^+}} + \frac{[Cl^-]}{k_2 Y_{ZnCl_2}} + \frac{[Cl^-]^2}{k_3 Y_{ZnCl_3^-}} + \frac{[Cl^-]^3}{k_4 Y_{ZnCl_4^{2-}}} \right)} \quad (S6)$$

$$[Cl^-] = [H^+] + 2[Zn^{2+}] + [ZnCl^+] - [ZnCl_3^-] - 2[ZnCl_4^{2-}] \quad (S7)$$

For the HCl+FeCl<sub>2</sub> system, Eqs. from S8 to S11 were considered for the dissociation species concentrations evaluation:

$$[FeCl^+] = \frac{[Fe^{2+}][Cl^-] Y_{Fe^{2+}} Y_{Cl^-}}{k_1 Y_{FeCl^+}} \quad (S8)$$

$$[Fe]_{TOT} = [FeCl^+] + [Fe^{2+}] \quad (S9)$$

$$[Fe^{2+}] = \frac{[Fe]_{TOT}}{1 + \frac{[Cl^-] Y_{Fe^{2+}} Y_{Cl^-}}{k_1 Y_{FeCl^+}}} \quad (S10)$$

$$[Cl^-] = [H^+] + 2[Fe^{2+}] + [FeCl^+] \quad (S11)$$

The ions activity coefficients reported in Eqs. S1-S11 were evaluated from Davies equation[1] which gives the mean activity coefficient of an electrolyte that dissociates into ions having charges  $z_i$  as a function of ionic strength  $I$ :

$$-\log Y_{\pm} = 0.5042 z_1^2 \left( \frac{\sqrt{I}}{1 + \sqrt{I}} - 0.3I \right) \quad (S12)$$

Specifically, for the HCl+ZnCl<sub>2</sub> system Eqs. S13 and S14 were considered, while for the HCl+FeCl<sub>2</sub> system Eqs. S15 and S16 are reported:

$$Y_{\pm} \simeq Y_{Cl^-} \simeq Y_{ZnCl^+} \simeq Y_{ZnCl_3^-} \quad (S13)$$

$$Y_{2\pm} \simeq Y_{Zn^{2+}} \simeq Y_{ZnCl_4^{2-}} \quad (S14)$$

$$Y_{\pm} \simeq Y_{Cl^-} \simeq Y_{FeCl^+} \quad (S15)$$

$$Y_{2\pm} \simeq Y_{Fe^{2+}} \quad (S16)$$

The dissociation % species is defined as the ratio between the concentration of the different species in solution and the total metal concentration.

$$dissociation \%_{species} = \frac{[species]}{[Metal]_{TOT}} \times 100 \quad (S17)$$

It is thus possible to evaluate the dissociation factor by multiply the different dissociation % species by the number of discrete ions obtained from the dissociation reactions of ZnCl<sub>2</sub> or FeCl<sub>2</sub> that produce the particular species:

$$ZnCl_{2dissociation\ factor} = \frac{3[Zn^{2+}] + 2[ZnCl^+] + [ZnCl_2] + [ZnCl_3^-] + [ZnCl_4^{2-}]}{[Zn]_{TOT}} \quad (S18)$$

$$FeCl_{2dissociation\ factor} = \frac{3[Fe^{2+}] + 2[FeCl^+]}{[Fe]_{TOT}} \quad (S19)$$

## References

1. Davies, C. W. *Ion Association*; Butterworths: London, 1962.
